# Supplementary material for: Ultralow thermal conductivity and thermally-deactivated electrical transport in a 1D silver array with alternating δ-bonds
Source: Royal Society of Chemistry journal article supplement (doi:10.1039/d4sc04165h), 2024-01-01
Supplement: d4sc04165h1.pdf [file d4sc04165h1.pdf]

**Electronic Supplementary Information for**

**Ultralow thermal conductivity and thermally-deactivated electrical transport in a 1D silver array with alternating  $\delta$ -bonds**

Nahid Hassan,<sup>a</sup> Suneetha Nagaraja,<sup>b</sup> Sauvik Saha,<sup>a</sup> Kartick Tarafder,<sup>b</sup> and Nirmalya Ballav<sup>\*a</sup>

*<sup>a</sup>Department of Chemistry, Indian Institute of Science Education and Research, Dr. Homi Bhabha Road, Pune – 411 008, India.*

*<sup>b</sup>Department of Physics, National Institute of Technology Karnataka, Surathkal, Mangalore – 575 025, India.*

**[\\*nballav@iiserpune.ac.in](mailto:nballav@iiserpune.ac.in)**

## Experimental

### Materials

Silver(I) bromide (AgBr; 99%), tetramethylammonium bromide (TMAB;  $\geq 98\%$ ) and hydrobromic acid (48 wt.% in H<sub>2</sub>O;  $\geq 99.99\%$ ) were purchased from Sigma-Aldrich. Acetone (HPLC grade), DMF (HPLC grade), DMSO (HPLC grade) and hypophosphorous acid (H<sub>3</sub>PO<sub>2</sub>; 50 wt.% in H<sub>2</sub>O) were purchased from RANKEM (India). All chemicals were used without any further purification.

### Synthesis of (TMA)AgBr<sub>2</sub> single crystals

Single crystals of (TMA)AgBr<sub>2</sub> is synthesized following a slow cooling process. Typically, 1 mmol TMAB (154.04 mg) and 1 mmol AgBr (187.77 mg) are taken in a glass vial. A mixed solvent of 4 mL DMF, 1 mL DMSO and 3 mL Acetone is then added to the vial, followed by the addition of 200  $\mu$ L H<sub>3</sub>PO<sub>2</sub> to prevent any areal oxidation. The resulting solution is sonicated and subsequently heated at 65 °C for 6 h to dissolve the reactants. Then the reaction mixture is filtered through a 0.22  $\mu$  syringe filter, and finally allowed to cool to room temperature naturally. Sharp needle like white crystals were yielded upon cooling. Crystals were further filtered, washed with acetone and dried in a vacuum oven at 100 °C for 12 h before additional characterization.

### Characterization

Single crystals were taken for diffraction in a Bruker Smart Apex Duo diffractometer at 150 K, 298 K and 340 K using Mo K $\alpha$  radiation ( $\lambda = 0.71073$  Å). APEX4 software was used to do the absorption corrections. Crystal structure was solved by the direct method and refined by full-matrix least-squares on F2(SHELXL-2014/6) and Olex2 with ShelXT2 structure solution program.<sup>1-3</sup> Additional structural refinement data are presented in the Supplementary Information. PXRD patterns were recorded on a Bruker D8 Advance diffractometer with Cu K $\alpha$  radiation ( $\lambda = 1.5406$  Å). XPS spectra were recorded by using a Thermo Kalpha+ spectrometer equipped with micro-focused and monochromated AlK $\alpha$  radiation. TGA profiles were recorded using Perkin-Elmer thermal analyzer STA 6000 model. Differential Scanning Calorimetry (DSC) measurements were done using TA Q20 differential scanning calorimeter. Thermal diffusivity measurements were carried out on Linses LFA 1000. Solid-state UV-vis spectra were recorded on Shimadzu UV-vis-

NIR spectrophotometer (Model UV-3600 plus). Electrical transport measurements on pelletized samples were carried out using a Keithley 4200 SCS Parameter Analyzer system assembled with an Everbeing probe station using Au-plated W-tip as micro-contact electrodes. Raman spectra ( $\lambda_{\text{exc}} = 632.8 \text{ nm}$ ) were recorded at Raman microscope (LabRAM HR, HoribaJobinYvon) using a 50x objective lens (spectral resolution of the system is  $\sim 1 \text{ cm}^{-1}$ ).

### **Computational details**

The structure is optimized and electronic properties are calculated using the density functional theory as implemented in the Vienna Abinitio Simulation Package (VASP).<sup>4</sup> The Energy convergence criteria is set to  $10^{-5} \text{ eV}$  and the accuracy of force convergence on all atoms is set to  $0.01 \text{ eV \AA}^{-1}$ . A conjugate gradient algorithm is used to relax the ions into their instantaneous ground states. The brillioun zone sampling is done using the Gamma only k-point grid with k-point mesh of  $4 \times 3 \times 2$ . The Gaussian smearing method with smearing width  $0.05 \text{ eV}$  is used to optimize the orbitals. The generalized gradient approximation (GGA) exchange correlation is used to optimize the structure as suggested by Perdew, Burke and Ernzerhof (PBE). The on-site Coulomb interaction due to the 4d electrons has been taken into account using the DFT+U method with an effective U value of  $5.8 \text{ eV}$  and the value of U-J is  $5.8 \text{ eV}$  ( $J=0$ ).<sup>5</sup> The Projected and the total density of states are obtained from the optimized structure.

Table S1. Crystal data and structure refinement for the (TMA)AgBr<sub>2</sub> system (150 K).

|                                   |                                                     |                 |
|-----------------------------------|-----------------------------------------------------|-----------------|
| Empirical formula                 | C <sub>4</sub> H <sub>12</sub> Ag Br <sub>2</sub> N |                 |
| Formula weight                    | 341.84                                              |                 |
| Temperature                       | 150(2) K                                            |                 |
| Wavelength                        | MoK $\alpha$ ( $\lambda$ = 0.71073 Å)               |                 |
| Crystal system                    | Orthorhombic                                        |                 |
| Space group                       | I m m m                                             |                 |
| Unit cell dimensions              | a = 6.7744(13) Å                                    | $\alpha$ = 90°. |
|                                   | b = 9.1274(19) Å                                    | $\beta$ = 90°.  |
|                                   | c = 15.003(3) Å                                     | $\gamma$ = 90°. |
| Volume                            | 927.7(3) Å <sup>3</sup>                             |                 |
| Z                                 | 4                                                   |                 |
| Density (calculated)              | 2.448 g/cm <sup>3</sup>                             |                 |
| Absorption coefficient            | 10.708 mm <sup>-1</sup>                             |                 |
| F(000)                            | 640                                                 |                 |
| Crystal size                      | 0.681 x 0.119 x 0.044 mm <sup>3</sup>               |                 |
| Theta range for data collection   | 2.612 to 25.361°.                                   |                 |
| Index ranges                      | -7 ≤ h ≤ 8, -10 ≤ k ≤ 10, -17 ≤ l ≤ 18              |                 |
| Reflections collected             | 4058                                                |                 |
| Independent reflections           | 512 [R(int) = 0.0580]                               |                 |
| Completeness to theta = 25.242°   | 99.4 %                                              |                 |
| Absorption correction             | Semi-empirical from equivalents                     |                 |
| Max. and min. transmission        | 0.7452 and 0.3149                                   |                 |
| Refinement method                 | Full-matrix least-squares on F <sup>2</sup>         |                 |
| Data / restraints / parameters    | 512 / 9 / 31                                        |                 |
| Goodness-of-fit on F <sup>2</sup> | 1.107                                               |                 |
| Final R indices [I > 2sigma(I)]   | R1 = 0.0769, wR2 = 0.1817                           |                 |
| R indices (all data)              | R1 = 0.0800, wR2 = 0.1837                           |                 |
| Extinction coefficient            | n/a                                                 |                 |
| Largest diff. peak and hole       | 1.692 and -3.345 e.Å <sup>-3</sup>                  |                 |

Table S2. Atomic Coordinates ( $\times 10^4$ ) and equivalent isotropic displacement parameters ( $\text{\AA}^2 \times 10^3$ ) for the (TMA)AgBr<sub>2</sub> single crystal (150 K).

---

U(eq) is defined as one third of the trace of the orthogonalized  $U^{ij}$  tensor.

---

|       | x        | y        | z        | U(eq) |
|-------|----------|----------|----------|-------|
| Ag(1) | 7326(3)  | 5000     | 5000     | 29(1) |
| Br(1) | 10000    | 5000     | 6368(2)  | 26(1) |
| Br(2) | 5000     | 2609(4)  | 5000     | 31(1) |
| N(1)  | 5000     | 5000     | 8027(16) | 25(5) |
| C(1)  | 5000     | 3680(20) | 7419(15) | 33(4) |
| C(2)  | 6810(40) | 5000     | 8615(17) | 55(7) |

---

Table S3. Bond lengths and bond angles in the (TMA)AgBr<sub>2</sub> single crystal (150 K).

|                       | Length/Å   |
|-----------------------|------------|
| Ag(1)-Br(2)           | 2.692(3)   |
| Ag(1)-Br(2)#1         | 2.692(3)   |
| Ag(1)-Br(1)           | 2.738(3)   |
| Ag(1)-Br(1)#2         | 2.738(3)   |
| Ag(1)-Ag(1)#1         | 3.152(5)   |
| N(1)-C(1)             | 1.51(3)    |
| N(1)-C(1)#3           | 1.51(3)    |
| N(1)-C(2)             | 1.51(3)    |
| N(1)-C(2)#3           | 1.51(3)    |
|                       | Angle/°    |
| Br(2)-Ag(1)-Br(2)#1   | 108.34(11) |
| Br(2)-Ag(1)-Br(1)     | 112.79(3)  |
| Br(2)#1-Ag(1)-Br(1)   | 112.79(3)  |
| Br(2)-Ag(1)-Br(1)#2   | 112.79(3)  |
| Br(2)#1-Ag(1)-Br(1)#2 | 112.79(3)  |
| Br(1)-Ag(1)-Br(1)#2   | 97.14(10)  |
| Br(2)-Ag(1)-Ag(1)#1   | 54.17(6)   |
| Br(2)#1-Ag(1)-Ag(1)#1 | 54.17(6)   |
| Br(1)-Ag(1)-Ag(1)#1   | 131.43(5)  |
| Br(1)#2-Ag(1)-Ag(1)#1 | 131.43(5)  |
| Ag(1)#2-Br(1)-Ag(1)   | 82.86(10)  |
| Ag(1)-Br(2)-Ag(1)#1   | 71.66(11)  |
| C(1)-N(1)-C(1)#3      | 106(2)     |
| C(1)-N(1)-C(2)        | 110.7(7)   |
| C(1)#3-N(1)-C(2)      | 110.7(7)   |
| C(1)-N(1)-C(2)#3      | 110.7(7)   |
| C(1)#3-N(1)-C(2)#3    | 110.7(7)   |
| C(2)-N(1)-C(2)#3      | 109(3)     |

Symmetry transformations used to generate equivalent atoms:

#1 -x+1,-y+1,-z+1 #2 -x+2,-y+1,-z+1 #3 -x+1,-y+1,z

Table S4. Crystal data and structure refinement for the (TMA)AgBr<sub>2</sub> system (298 K).

|                                   |                                                     |          |
|-----------------------------------|-----------------------------------------------------|----------|
| Empirical formula                 | C <sub>4</sub> H <sub>12</sub> Ag Br <sub>2</sub> N |          |
| Formula weight                    | 341.84                                              |          |
| Temperature                       | 298(2) K                                            |          |
| Wavelength                        | 0.71073 Å                                           |          |
| Crystal system                    | Orthorhombic                                        |          |
| Space group                       | I m m m                                             |          |
| Unit cell dimensions              | a = 6.7923(10) Å                                    | a = 90°. |
|                                   | b = 9.1285(16) Å                                    | b = 90°. |
|                                   | c = 15.017(2) Å                                     | g = 90°. |
| Volume                            | 931.1(2) Å <sup>3</sup>                             |          |
| Z                                 | 4                                                   |          |
| Density (calculated)              | 2.439 g/cm <sup>3</sup>                             |          |
| Absorption coefficient            | 10.668 mm <sup>-1</sup>                             |          |
| F(000)                            | 640                                                 |          |
| Crystal size                      | 0.437 x 0.117 x 0.074 mm <sup>3</sup>               |          |
| Theta range for data collection   | 3.292 to 24.673°.                                   |          |
| Index ranges                      | -7 ≤ h ≤ 7, -10 ≤ k ≤ 10, -17 ≤ l ≤ 17              |          |
| Reflections collected             | 3750                                                |          |
| Independent reflections           | 475 [R(int) = 0.0429]                               |          |
| Completeness to theta = 24.673°   | 99.6 %                                              |          |
| Absorption correction             | Semi-empirical from equivalents                     |          |
| Max. and min. transmission        | 0.7451 and 0.4357                                   |          |
| Refinement method                 | Full-matrix least-squares on F <sup>2</sup>         |          |
| Data / restraints / parameters    | 475 / 6 / 32                                        |          |
| Goodness-of-fit on F <sup>2</sup> | 1.085                                               |          |
| Final R indices [I > 2σ(I)]       | R1 = 0.0234, wR2 = 0.0445                           |          |
| R indices (all data)              | R1 = 0.0260, wR2 = 0.0454                           |          |
| Extinction coefficient            | 0.0027(3)                                           |          |
| Largest diff. peak and hole       | 0.486 and -0.466 e.Å <sup>-3</sup>                  |          |

Table S5. Crystal data and structure refinement for the (TMA)AgBr<sub>2</sub> system (340 K).

|                                   |                                                     |          |
|-----------------------------------|-----------------------------------------------------|----------|
| Empirical formula                 | C <sub>4</sub> H <sub>12</sub> Ag Br <sub>2</sub> N |          |
| Formula weight                    | 341.84                                              |          |
| Temperature                       | 340(2) K                                            |          |
| Wavelength                        | 0.71073 Å                                           |          |
| Crystal system                    | Orthorhombic                                        |          |
| Space group                       | I m m m                                             |          |
| Unit cell dimensions              | a = 6.797(3) Å                                      | a = 90°. |
|                                   | b = 9.193(5) Å                                      | b = 90°. |
|                                   | c = 15.120(7) Å                                     | g = 90°. |
| Volume                            | 944.8(8) Å <sup>3</sup>                             |          |
| Z                                 | 4                                                   |          |
| Density (calculated)              | 2.403 g/cm <sup>3</sup>                             |          |
| Absorption coefficient            | 10.514 mm <sup>-1</sup>                             |          |
| F(000)                            | 640                                                 |          |
| Crystal size                      | 0.498 x 0.098 x 0.078 mm <sup>3</sup>               |          |
| Theta range for data collection   | 2.593 to 25.006°.                                   |          |
| Index ranges                      | -7 ≤ h ≤ 8, -10 ≤ k ≤ 10, -17 ≤ l ≤ 17              |          |
| Reflections collected             | 5184                                                |          |
| Independent reflections           | 500 [R(int) = 0.0974]                               |          |
| Completeness to theta = 25.006°   | 99.2 %                                              |          |
| Absorption correction             | Semi-empirical from equivalents                     |          |
| Max. and min. transmission        | 0.0971 and 0.0213                                   |          |
| Refinement method                 | Full-matrix least-squares on F <sup>2</sup>         |          |
| Data / restraints / parameters    | 500 / 0 / 31                                        |          |
| Goodness-of-fit on F <sup>2</sup> | 1.147                                               |          |
| Final R indices [I > 2σ(I)]       | R1 = 0.0893, wR2 = 0.2333                           |          |
| R indices (all data)              | R1 = 0.1083, wR2 = 0.2576                           |          |
| Extinction coefficient            | n/a                                                 |          |
| Largest diff. peak and hole       | 1.663 and -2.205 e.Å <sup>-3</sup>                  |          |

Table S6. Variable temperature SCXRD parameters of (TMA)AgBr<sub>2</sub> single crystal.

| Temperature                    | 150 K      | 298 K      | 340 K     |
|--------------------------------|------------|------------|-----------|
| <b>a (Å)</b>                   | 6.7744(13) | 6.7923(10) | 6.797(3)  |
| <b>b (Å)</b>                   | 9.1274(19) | 9.1285(16) | 9.193(5)  |
| <b>c (Å)</b>                   | 15.003(3)  | 15.017(2)  | 15.120(7) |
| <b><math>\alpha</math> (°)</b> | 90         | 90         | 90        |
| <b><math>\beta</math> (°)</b>  | 90         | 90         | 90        |
| <b><math>\gamma</math> (°)</b> | 90         | 90         | 90        |
| <b>Space Group</b>             | Immm       | Immm       | Immm      |

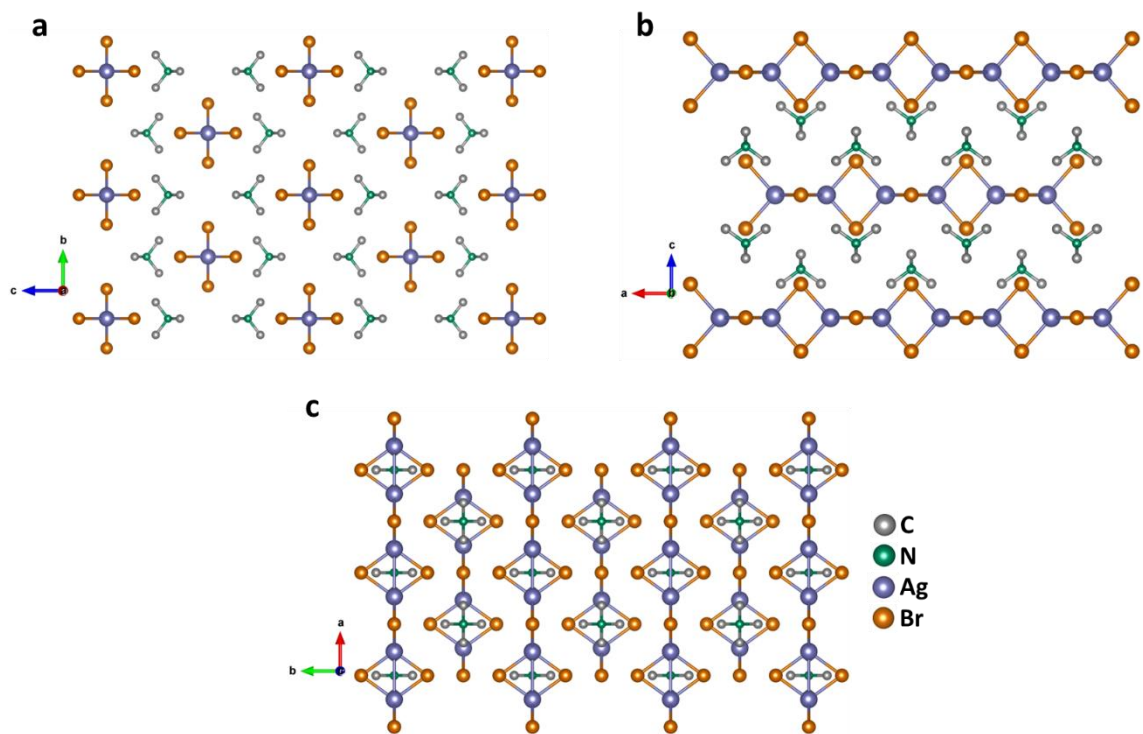

**Figure S1.** Crystal structure of (TMA)AgBr<sub>2</sub> viewed along (a) a-axis, (b) b-axis, and (c) c-axis. H atoms are omitted for clarity. Each (AgBr<sub>2</sub>)<sub>n</sub><sup>-</sup> inorganic chain is surrounded by six stacks of TMA<sup>+</sup> cations.

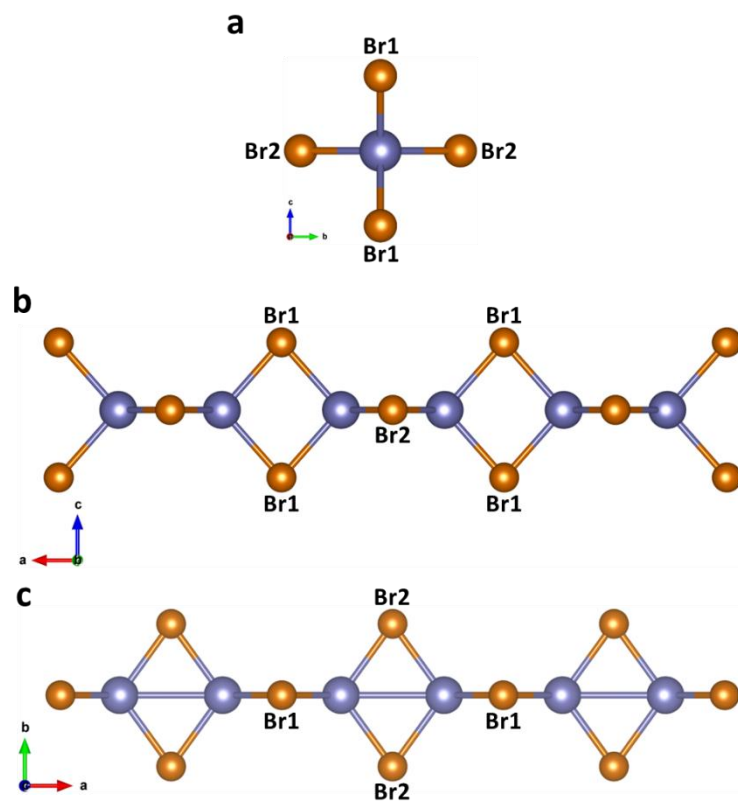

**Figure S2.** Polymeric chain of  $(\text{AgBr}_2)_n^-$  anions viewed along (a) a-axis, (b) b-axis and (c) c-axis. Silver and bromine atoms are represented by purple, and brown coloured spheres.

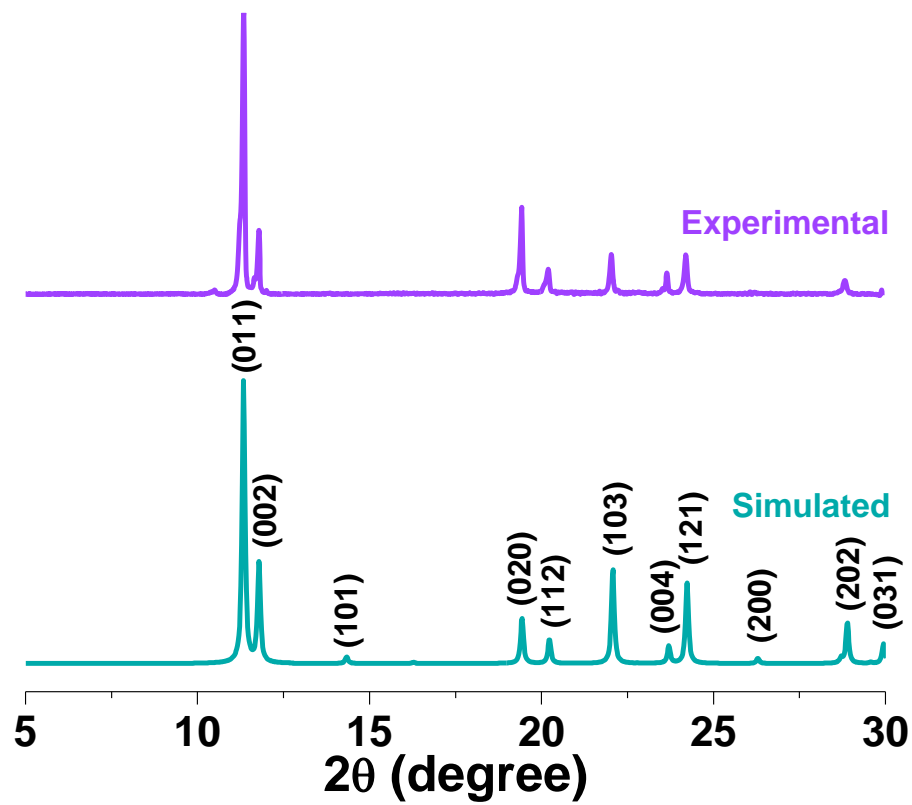

**Figure S3.** Comparison between the simulated and experimental PXRD patterns showing phase purity of (TMA)AgBr<sub>2</sub>.

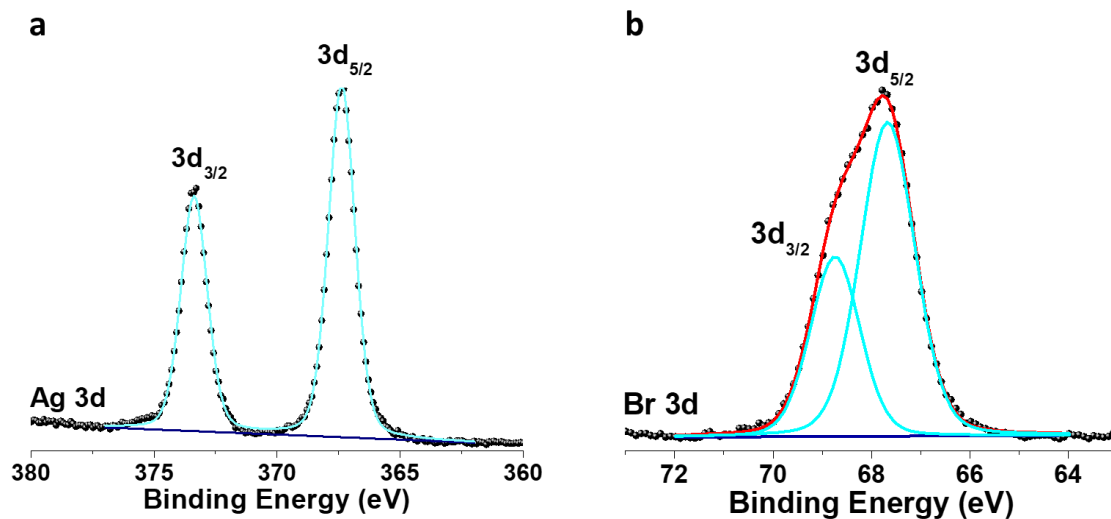

**Figure S4.** (a) Ag3d XPS spectrum featuring spin-orbit coupled ( $\sim 6.0$  eV) doublet signals ( $3d_{5/2}$  and  $3d_{3/2}$ ). Raw spectral data points (black spheres) were duly fitted (red lines). (b) Br3d XPS spectrum featuring spin-orbit coupled ( $\sim 1.05$  eV) doublet signals ( $3d_{5/2}$  and  $3d_{3/2}$ ). Raw spectral data points (black spheres) were duly fitted (red lines).

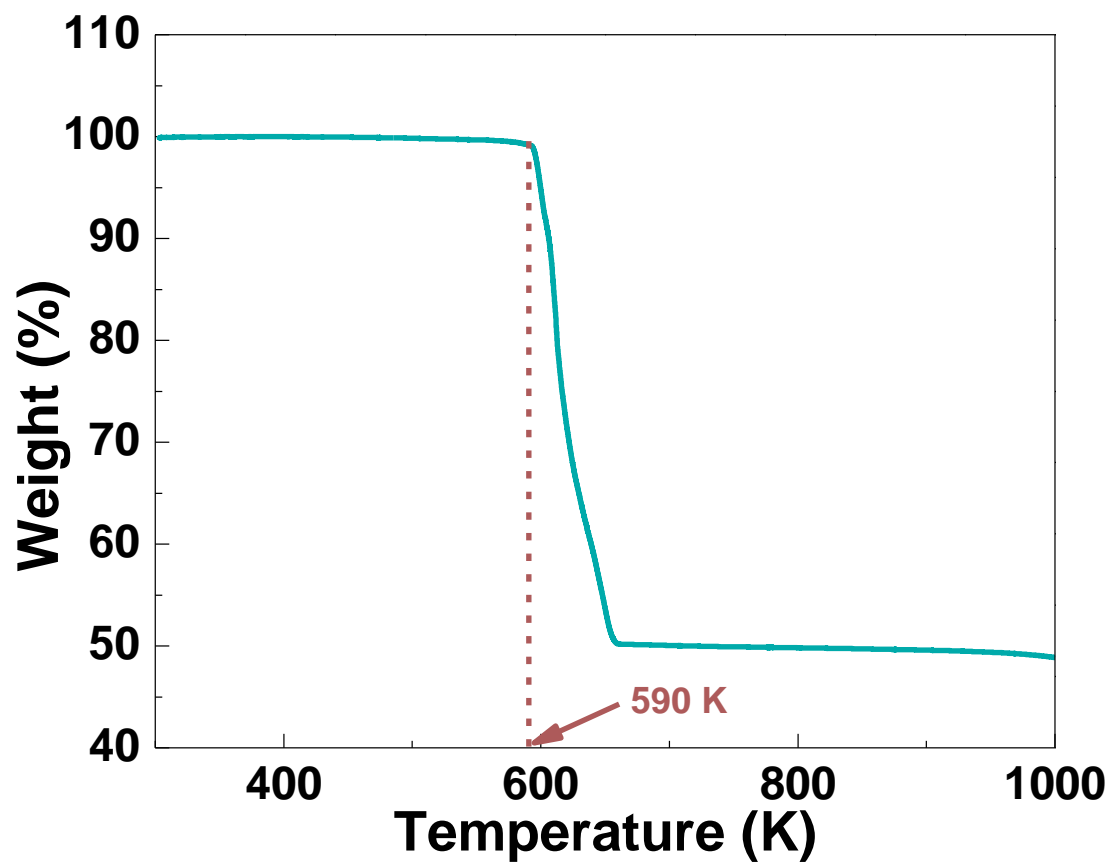

**Figure S5.** Thermogravimetric analysis (TGA) of (TMA)AgBr<sub>2</sub> indicating excellent thermal stability up to ~600 K.

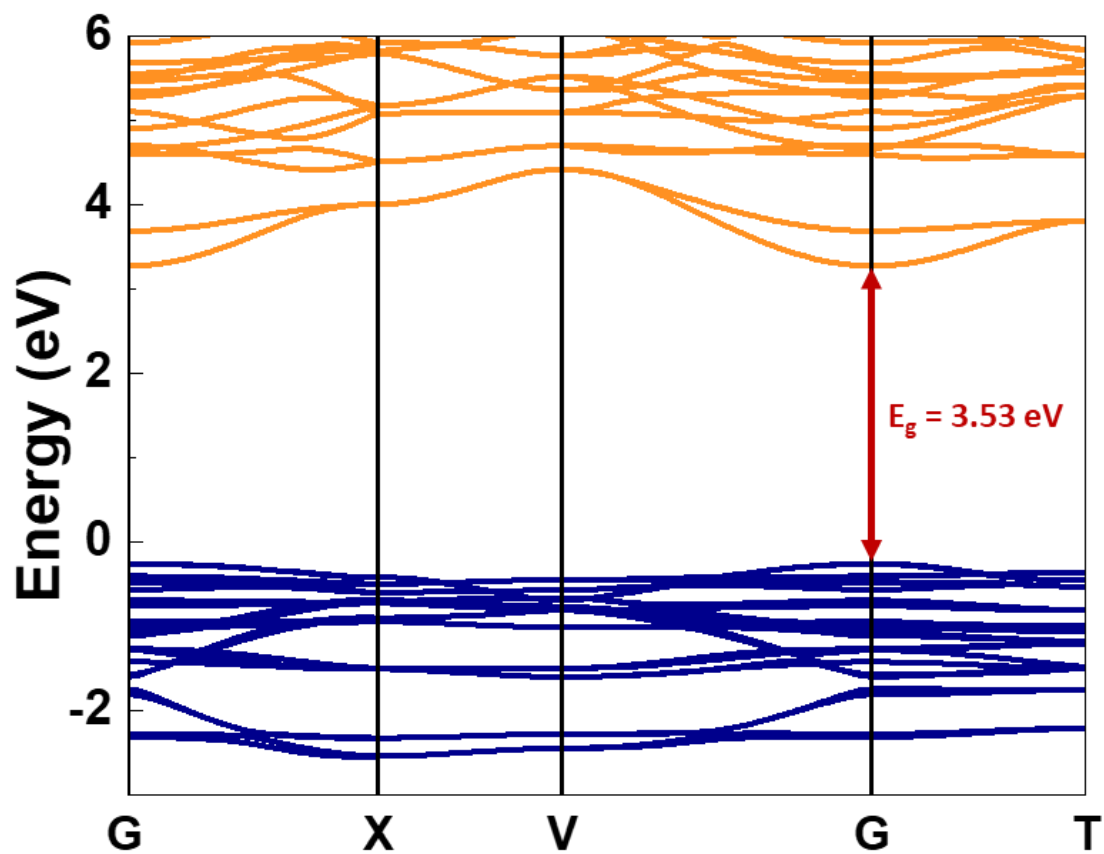

**Figure S6.** Electronic band structure calculated from density functional theory showing direct bandgap ( $E_g$ ) value of 3.53 eV at the Gamma (G) point.

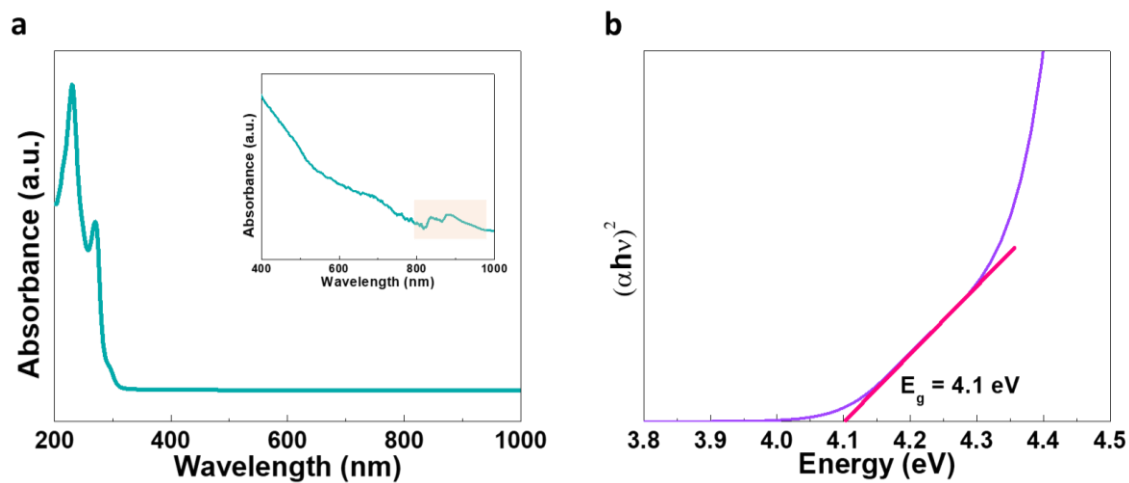

**Figure S7.** (a) Room temperature solid-state UV-visible absorption (DRS) spectrum of (TMA)AgBr<sub>2</sub> (inset: zoomed-in regions with finite absorption features at higher wavelengths). (b) Tauc plot of (TMA)AgBr<sub>2</sub> showing the experimental band gap.

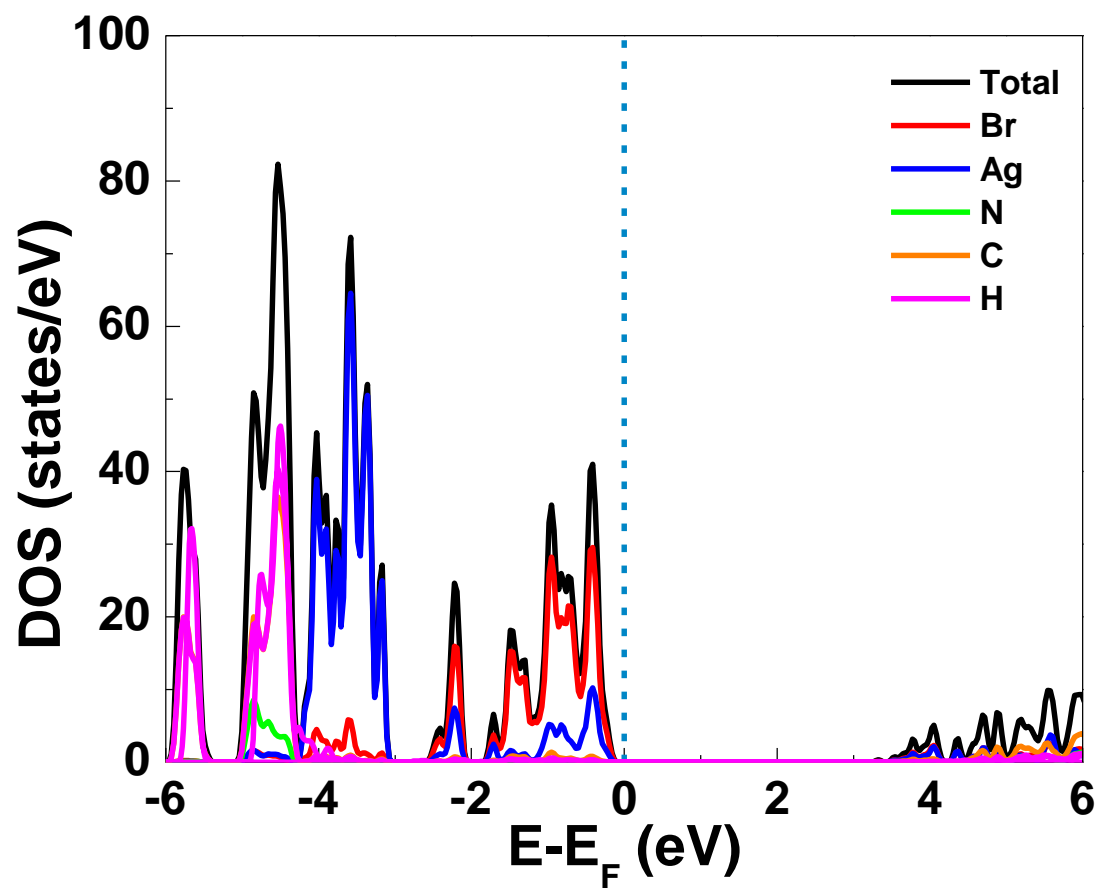

**Figure S8.** Density of states (DOS) plots exhibiting the total as well as atomic contributions. Dotted vertical line represents the Fermi level ( $E_F$ ).

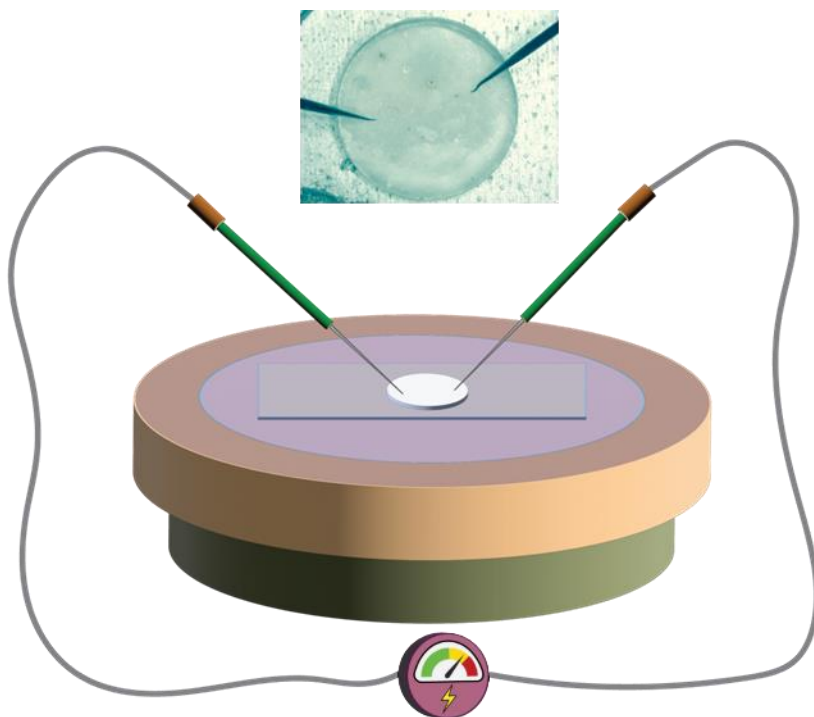

**Figure S9.** Schematic diagram of the device for two probe measurements of current-voltage ( $I$ - $V$ ) properties. Inset shows optical image of the real two probe set-up with contact electrodes.

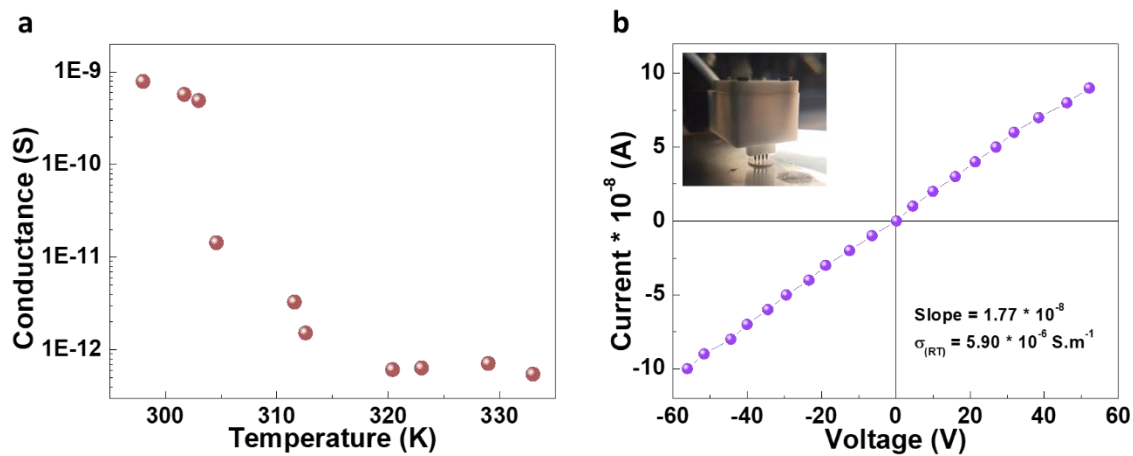

**Figure S10.** (a) Electrical conductance of (TMA)AgBr<sub>2</sub> as a function of temperature. (b) Room temperature electrical conductivity using colinear four probe set-up. Inset shows the real four probe device.

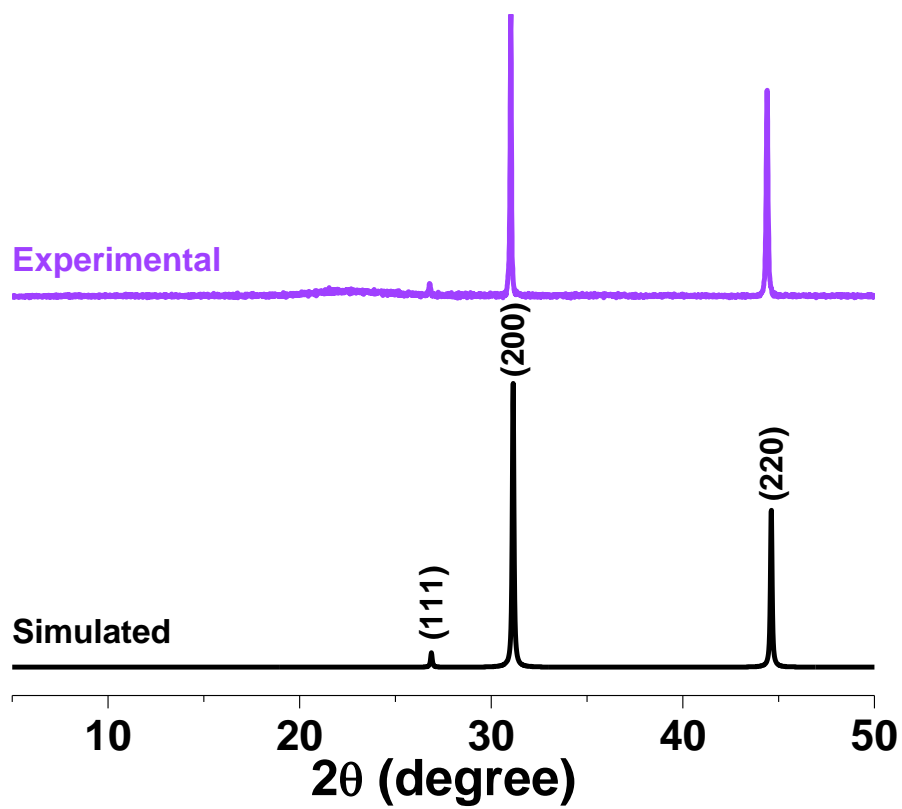

**Figure S11.** Comparison between the simulated and experimental PXRD patterns showing phase purity of commercial AgBr.

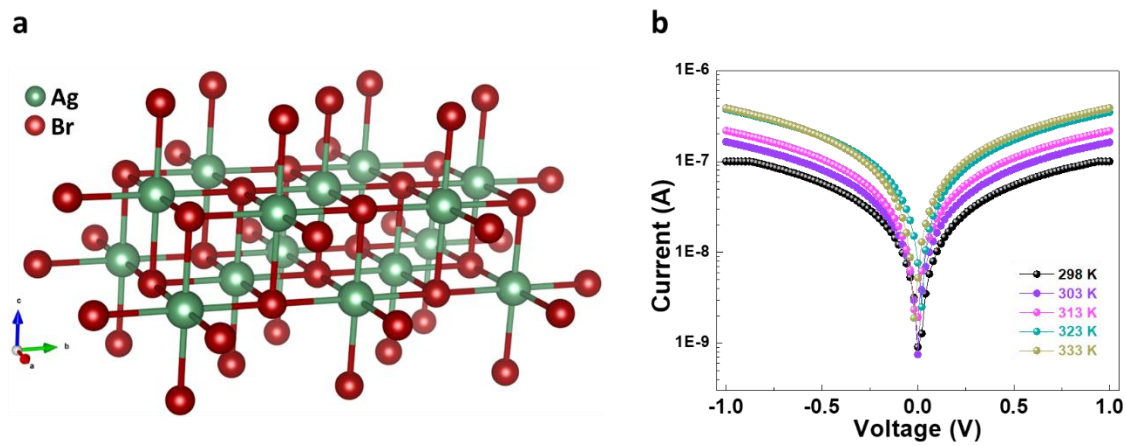

**Figure S12.** (a) Crystal structure of AgBr. (b) Variable temperature current-voltage ( $I$ - $V$ ) properties of AgBr.

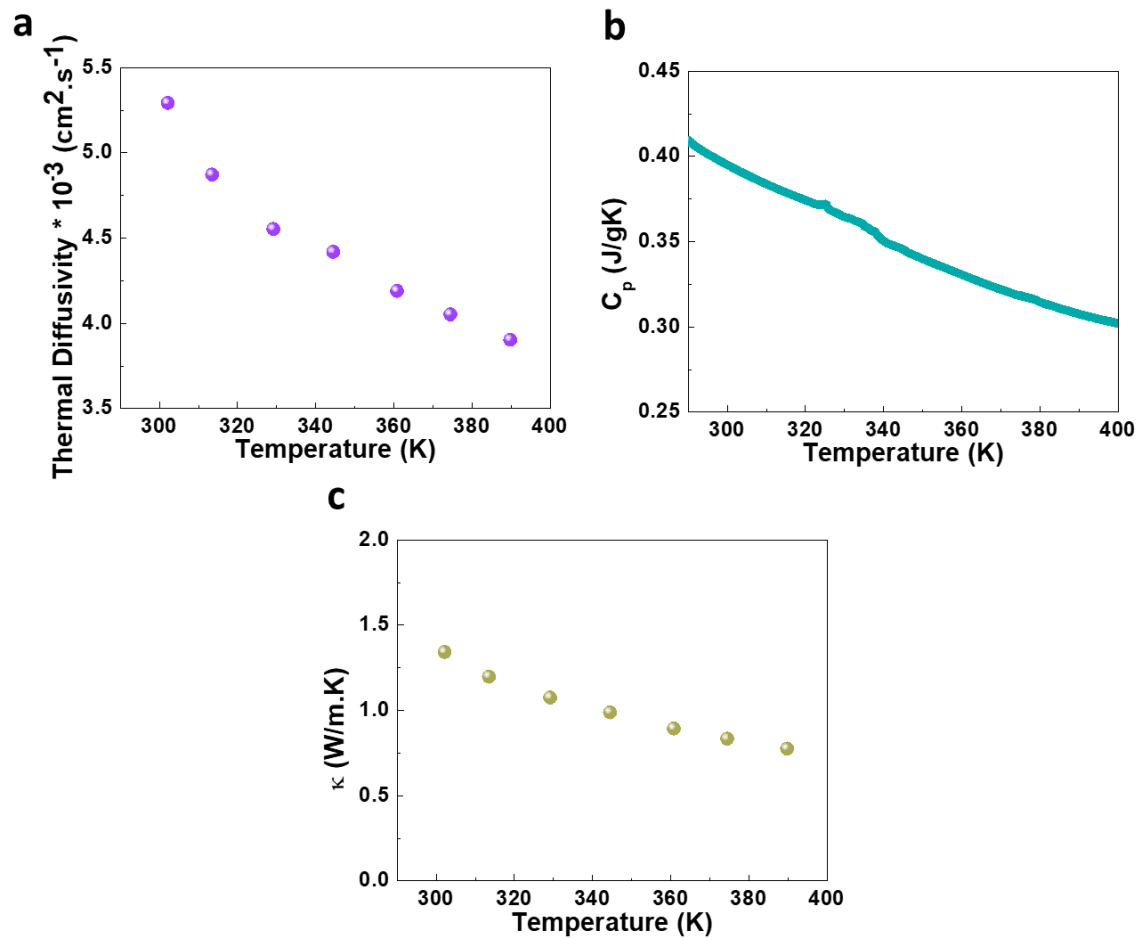

**Figure S13.** (a) Thermal diffusivity of AgBr as a function of temperature. (b) Heat capacity ( $C_p$ ) of AgBr as a function of temperature. (c) Variable temperature thermal conductivity of AgBr.

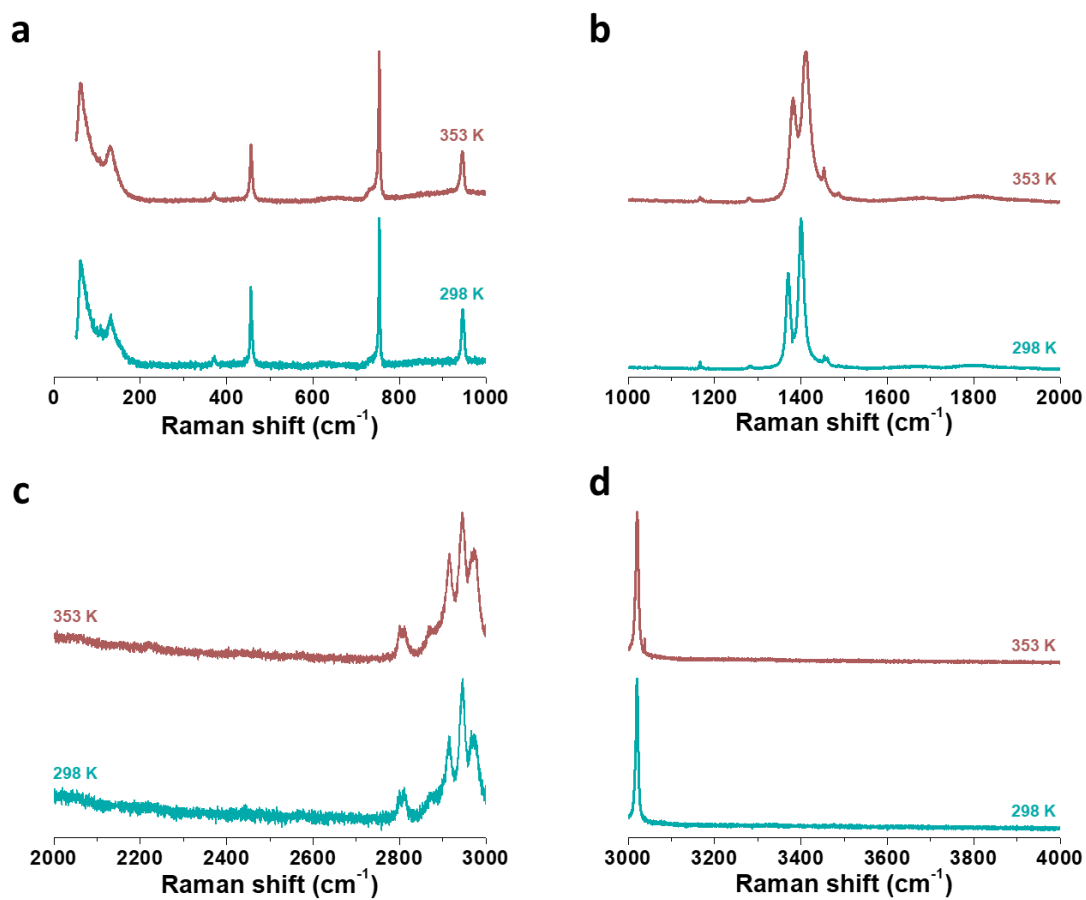

**Figure S14.** Zoomed-in variable temperature Raman spectra of (TMA)AgBr<sub>2</sub> in the range of (a) 0-1000 cm<sup>-1</sup>, (b) 1000-2000 cm<sup>-1</sup>, (c) 2000-3000 cm<sup>-1</sup>, and (d) 3000-4000 cm<sup>-1</sup>.

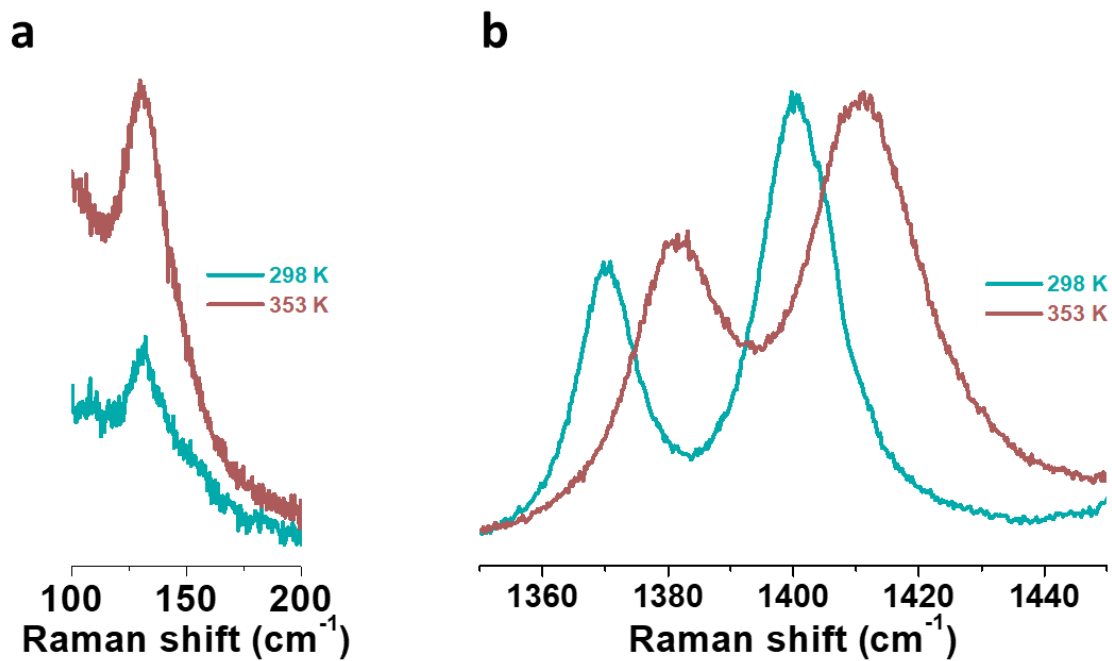

**Figure S15.** (a) Variable temperature Raman spectra indicative of characteristic Ag---Ag interaction. (b) Blue-shifting of Raman modes depicting change in phonon mode upon rise in temperature.

Table S7. Table of comparison of thermal conductivity of relevant reported literatures.

| No. | Material                                         | $\kappa$ (W.m <sup>-1</sup> .K <sup>-1</sup> ) | References                                                              |
|-----|--------------------------------------------------|------------------------------------------------|-------------------------------------------------------------------------|
| 1   | CsPbCl <sub>3</sub>                              | 0.49 (RT, total)                               | <i>J. Phys. Mater.</i> <b>2020</b> , 3, 024004.                         |
| 2   | CsPbBr <sub>3</sub>                              | 0.42 (RT, lattice)                             | <i>Proc. Natl. Acad. Sci. U. S. A.</i> <b>2017</b> , 114(33), 8693-8697 |
| 3   | CsPbBr <sub>3</sub>                              | 0.46 (RT, total)                               | <i>Nano Lett.</i> <b>2017</b> , 17, 5734– 5739.                         |
| 4   | CsPbI <sub>3</sub>                               | 0.45 (RT, lattice)                             | <i>Proc. Natl. Acad. Sci. U. S. A.</i> <b>2017</b> , 114(33), 8693-8697 |
| 5   | CsSnBr <sub>3</sub>                              | 0.64 (RT, lattice)                             | <i>J. Am. Chem. Soc.</i> <b>2020</b> , 142, 9553-9563.                  |
| 6   | CsSnI <sub>3</sub>                               | 0.38 (RT, lattice)                             | <i>Proc. Natl. Acad. Sci. U. S. A.</i> <b>2017</b> , 114(33), 8693-8697 |
| 7   | CsSnI <sub>3</sub>                               | 0.6 (RT, lattice)                              | <i>J. Am. Chem. Soc.</i> <b>2020</b> , 142, 9553-9563.                  |
| 8   | MAPbCl <sub>3</sub>                              | 0.73 (RT, total)                               | <i>Nano Lett.</i> <b>2017</b> , 17, 5734– 5739.                         |
| 9   | MAPbCl <sub>3</sub>                              | 0.50 (RT, ---)                                 | <i>J. Phys. Chem. C</i> <b>2017</b> , 121, 28306–28311.                 |
| 10  | MAPbBr <sub>3</sub>                              | 0.51 (RT, total)                               | <i>Nano Lett.</i> <b>2017</b> , 17, 5734– 5739.                         |
| 11  | MAPbBr <sub>3</sub>                              | 0.44 (RT, ---)                                 | <i>J. Phys. Chem. C</i> <b>2017</b> , 121, 28306–28311.                 |
| 12  | MAPbI <sub>3</sub>                               | 0.5 (RT, ---)                                  | <i>J. Phys. Chem. Lett.</i> <b>2014</b> , 5, 2488– 2492.                |
| 13  | MAPbI <sub>3</sub>                               | 0.59 (RT, lattice)                             | <i>Appl. Phys. Lett.</i> <b>2016</b> , 108, 063902.                     |
| 14  | MAPbI <sub>3</sub>                               | 0.34 (RT, ---)                                 | <i>J. Phys. Chem. C</i> <b>2017</b> , 121, 28306–28311.                 |
| 15  | FAPbBr <sub>3</sub>                              | 0.49 (RT, total)                               | <i>Nano Lett.</i> <b>2017</b> , 17, 5734– 5739.                         |
| 16  | CuBiI <sub>4</sub>                               | 0.38 (RT) (lattice)                            | <i>J. Am. Chem. Soc.</i> , <b>2023</b> , 145, 1349-1358.                |
| 17  | Cu <sub>2</sub> Se                               | 0.48 (1000 K, lattice)                         | <i>Nat. Mater.</i> <b>2012</b> , 11, 422.                               |
| 18  | CuFeS <sub>2</sub>                               | 8.42 (RT, lattice)                             | <i>J. Am. Chem. Soc.</i> <b>2019</b> , 141 (47),18900–18909.            |
| 19  | Ag <sub>2</sub> Te                               | 0.93 (RT, total)                               | <i>J. Alloys Compd.</i> <b>2005</b> , 393, 299–301.                     |
| 20  | AgSbSe <sub>2</sub>                              | 0.42 (100 K, lattice)                          | <i>Energy Environ. Sci.</i> <b>2013</b> , 6, 570–578.                   |
| 21  | AgSbTe <sub>2</sub>                              | 0.6 (RT, lattice)                              | <i>ACS Energy Lett.</i> <b>2021</b> , 6 (8), 2825–2837.                 |
| 22  | AgBiS <sub>2</sub>                               | 0.68 (RT, lattice)                             | <i>Chem. Mater.</i> <b>2019</b> , 31 (6), 2106–2113.                    |
| 23  | AgBiSe <sub>2</sub>                              | 0.63 (100 K, lattice)                          | <i>Energy Environ. Sci.</i> <b>2013</b> , 6, 570–578.                   |
| 24  | AgSnSbTe <sub>3</sub>                            | 0.47 (294 K, lattice)                          | <i>Angew. Chem. Int. Ed.</i> <b>2023</b> , 62, e202308515.              |
| 25  | AgPbBiSe <sub>3</sub>                            | 0.5 (290 K, lattice)                           | <i>Chem. Sci.</i> <b>2019</b> , 10 (18), 4905–4913.                     |
| 26  | Ag <sub>10</sub> Te <sub>4</sub> Br <sub>3</sub> | 0.43 (390 K, total)                            | <i>Nat. Mater.</i> <b>2009</b> , 8(2), 101–108.                         |
| 27  | CsAg <sub>5</sub> Te <sub>3</sub>                | 0.18 (296 K, total)                            | <i>Angew. Chem.,Int. Ed.</i> <b>2016</b> , 55 (38), 11431–11436.        |
| 28  | AgCrSe <sub>2</sub>                              | 0.46 (625 K, lattice)                          | <i>Nat. Mater.</i> <b>2018</b> , 17 (3), 226–230.                       |

|    |                                                                                      |                                      |                                                          |
|----|--------------------------------------------------------------------------------------|--------------------------------------|----------------------------------------------------------|
| 29 | Rb <sub>4</sub> Ag <sub>2</sub> BiBr <sub>9</sub>                                    | 0.1 (RT, total)                      | <i>Cryst. Growth Des.</i> <b>2022</b> , 22, 1066 – 1072. |
| 30 | (C <sub>3</sub> H <sub>7</sub> NH <sub>3</sub> ) <sub>4</sub><br>CuInCl <sub>8</sub> | 0.15 (RT, lattice)<br>   to pressing | <i>Angew. Chem. Int. Ed.</i> <b>2024</b> , e202406616    |
| 31 | (TMA)AgBr <sub>2</sub>                                                               | 0.6 (RT, total)                      | This Work                                                |

## References

- (1) Dolomanov, O. V.; Bourhis, L. J.; Gildea, R. J.; Howard, J. A. K.; Puschmann, H., OLEX2: a complete structure solution, refinement and analysis program. *J. Appl. Crystallogr.* **2009**, *42*, 339-341.
- (2) Sheldrick, G., Crystal structure refinement with SHELXL. *Acta Cryst. C* **2015**, *71*, 3-8.
- (3) Spek, A., Single-crystal structure validation with the program PLATON. *J. Appl. Crystallogr.* **2003**, *36*, 7-13.
- (4) Hafner, J., Ab-initio simulations of materials using VASP: Density-functional theory and beyond. *J. Comput. Chem.* **2008**, *29*, 2044-2078.
- (5) Anisimov, V. I.; Zaanen, J.; Andersen, O. K., Band theory and Mott insulators: Hubbard U instead of Stoner I. *Phys. Rev. B* **1991**, *44*, 943-954.
